# Supplementary material
Source: MDPI journal article supplement (https://www.mdpi.com/2072-4292/12/3/537)
Supplement: s1 [file s1]

Article

# Detecting the sources of methane emissions from oil shale mining and processing using airborne hyperspectral data

Chunlei Xiao, Bihong Fu\*, Hanqing Shui, Zhaocheng Guo and Jurui Zhu

Supplementary Material

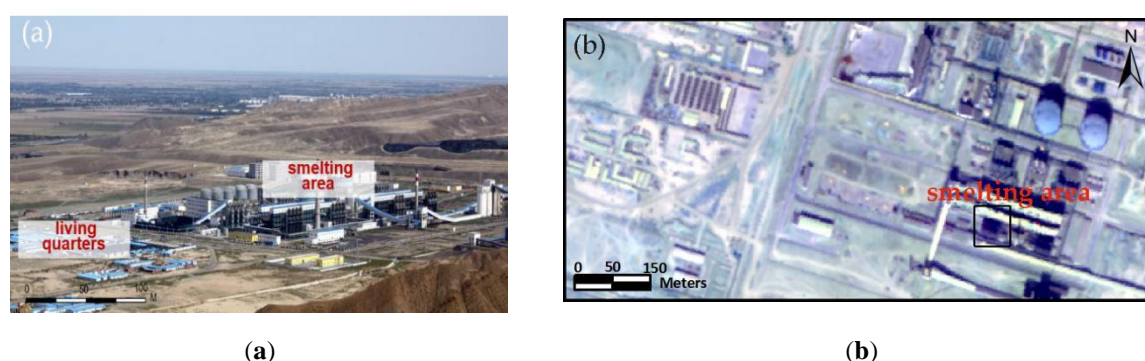

**Figure 1.** (a) The field photograph showing the oil-shale retorting plant; (b) The location (shown in the black box) of methane plumes observed using the thermal imaging camera.

**Video A1:** Video showing the methane plumes emitted from oil shale smelting area, which was acquired using a thermal imaging camera (FLIR GF320—<https://www.flir.cn/products/gf320>) around 9:00 am (Local Time) on August 8, 2019.
